# Supplementary material for: miRNA arm switching identifies novel tumour biomarkers
Source: PubMed Central journal article supplement — eBioMedicine. 2018 Nov 10;38:37–46. doi: 10.1016/j.ebiom.2018.11.003 (PMC6306400; doi:10.1016/j.ebiom.2018.11.003), 2018-11-10

**A****hsa-miR-30e-5p****hsa-miR-30e-3p**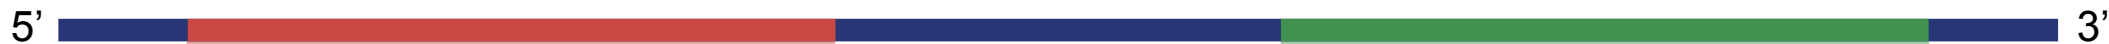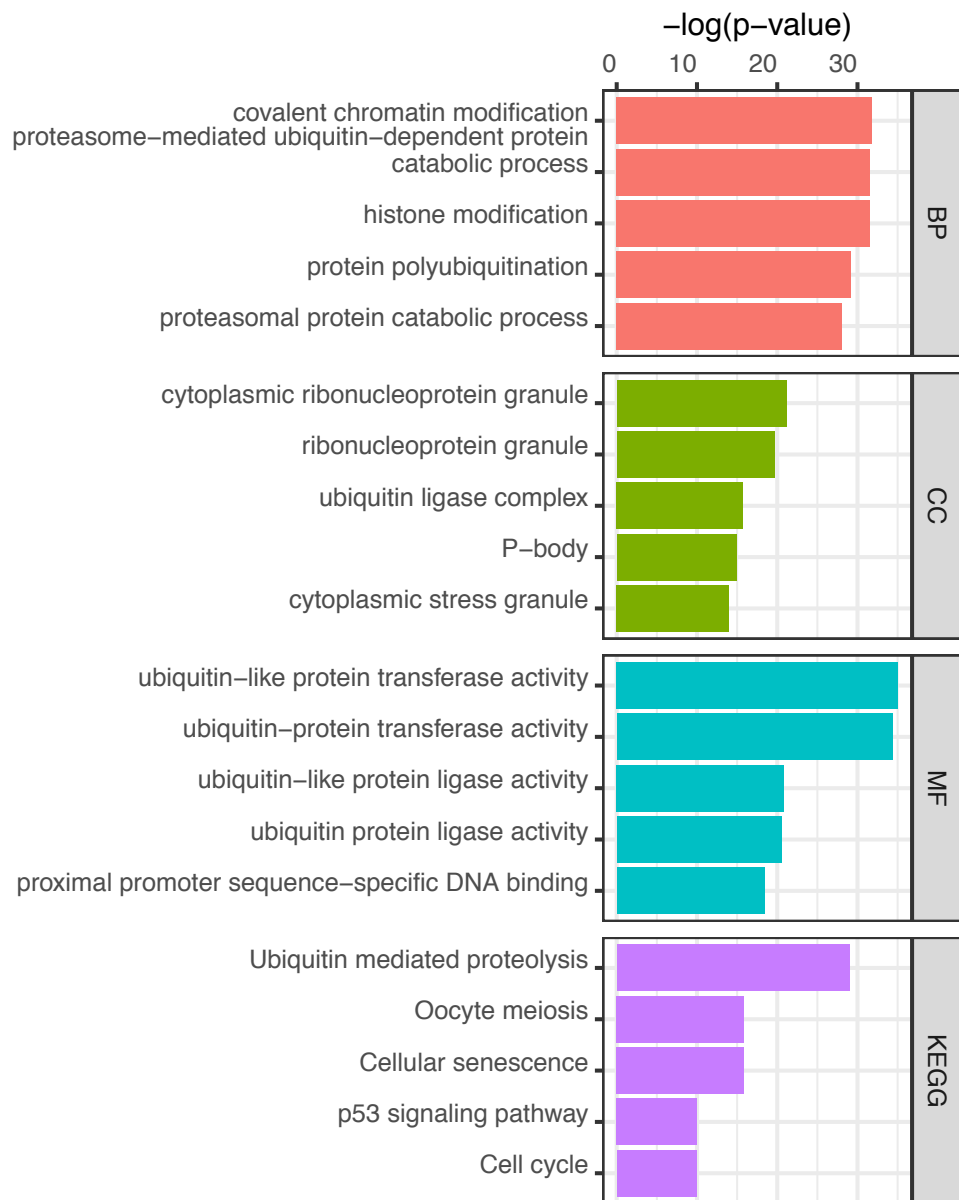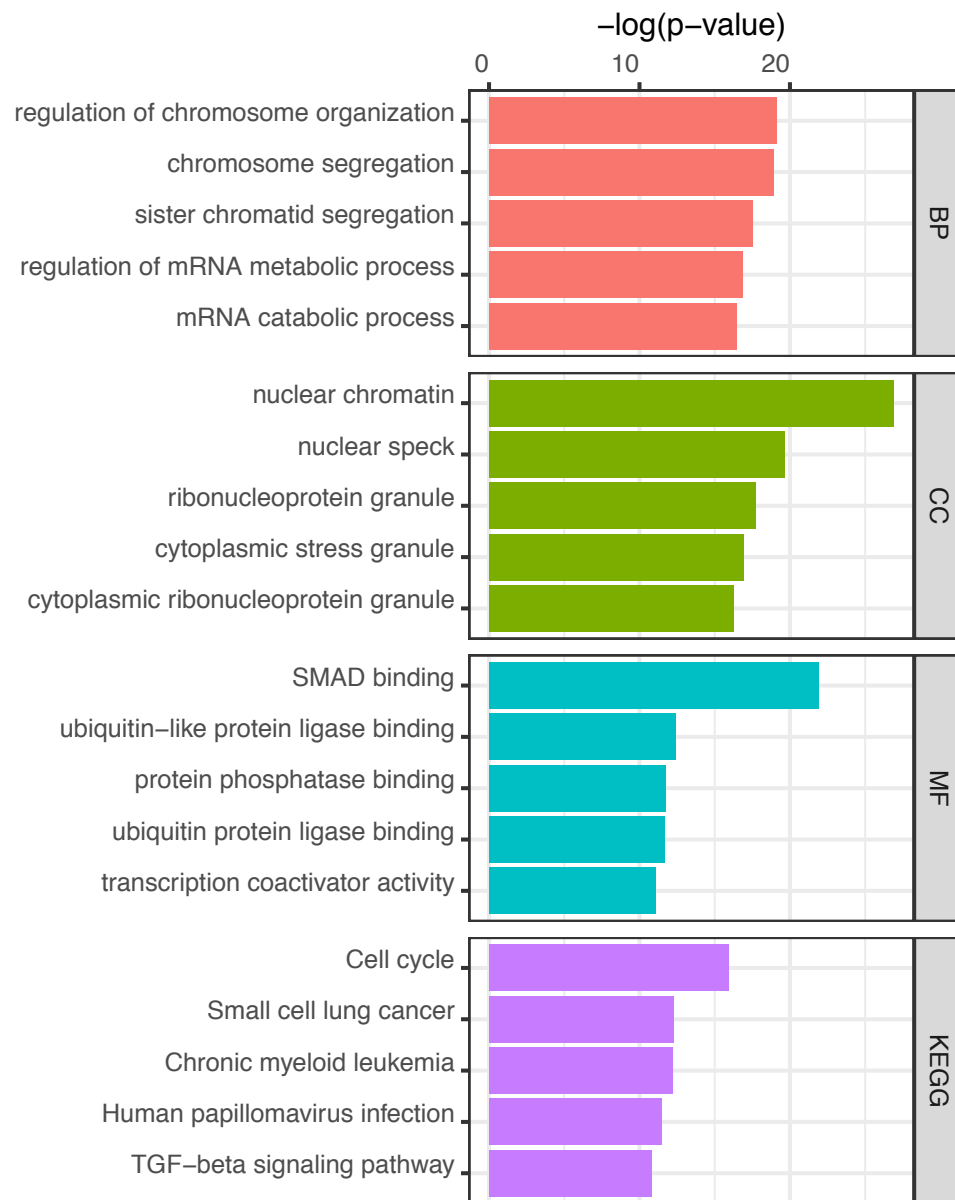

**B****hsa-miR-34b-5p****hsa-miR-34b-3p**

5'

3'

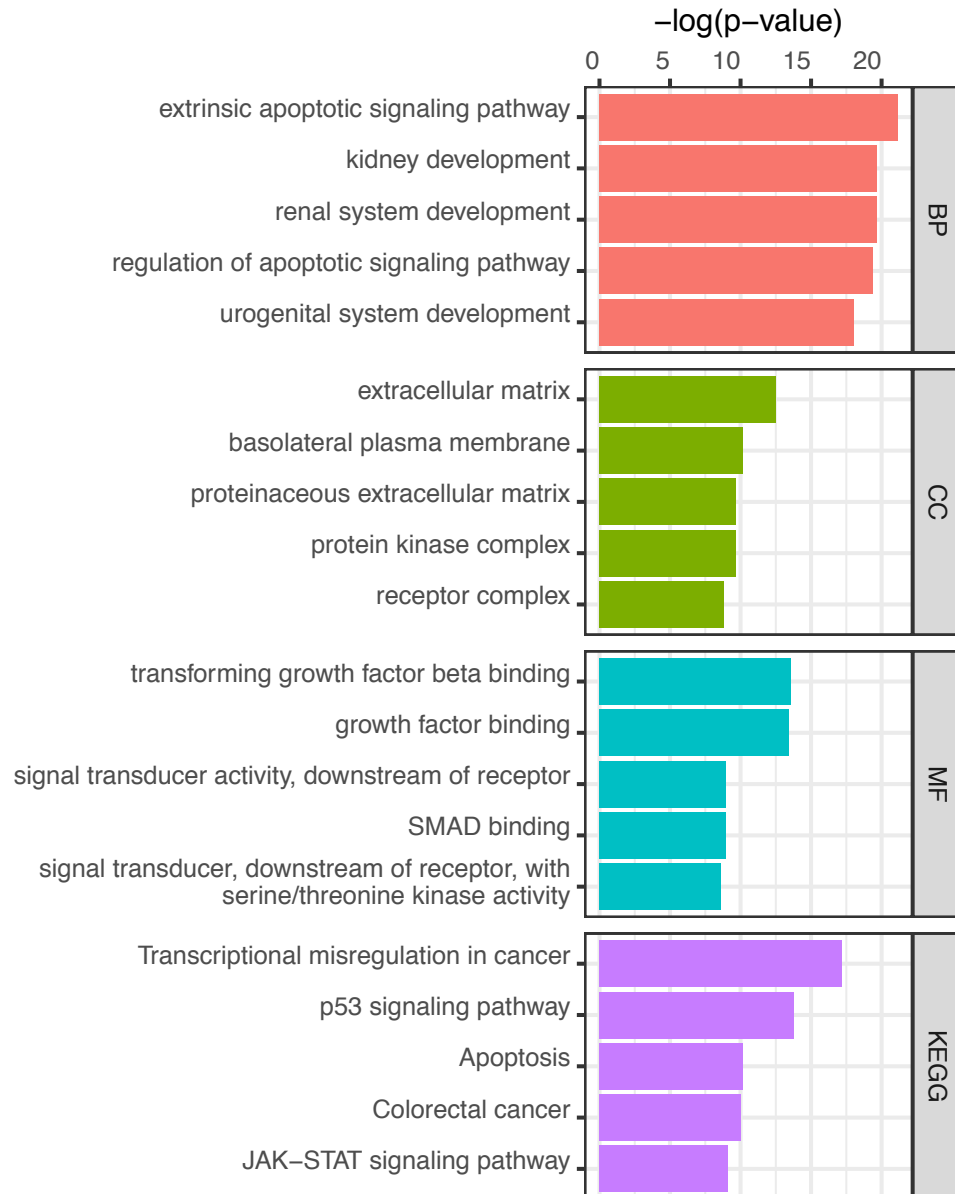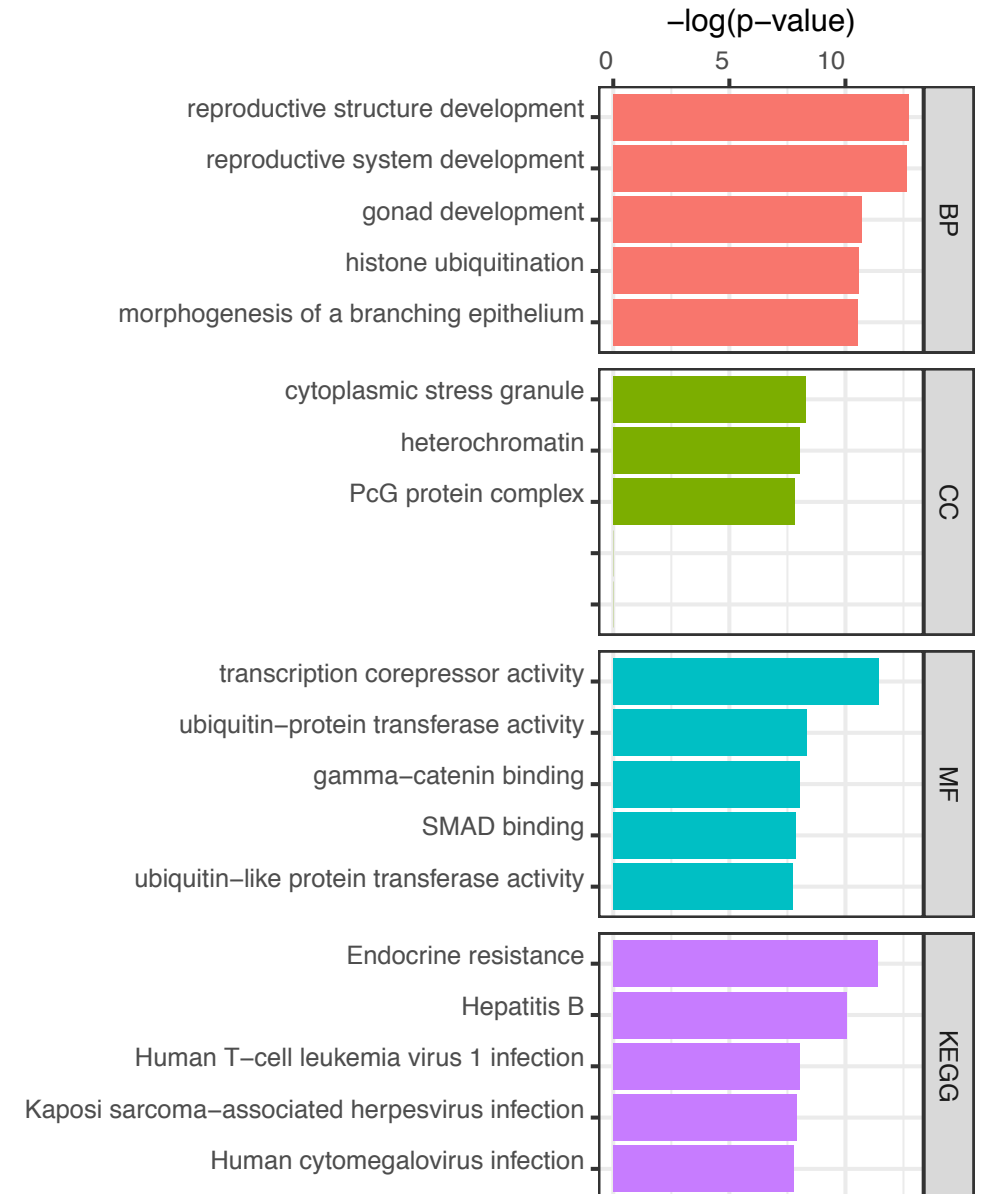

**C**

5'

**hsa-miR-106b-5p****hsa-miR-106b-3p**

3'

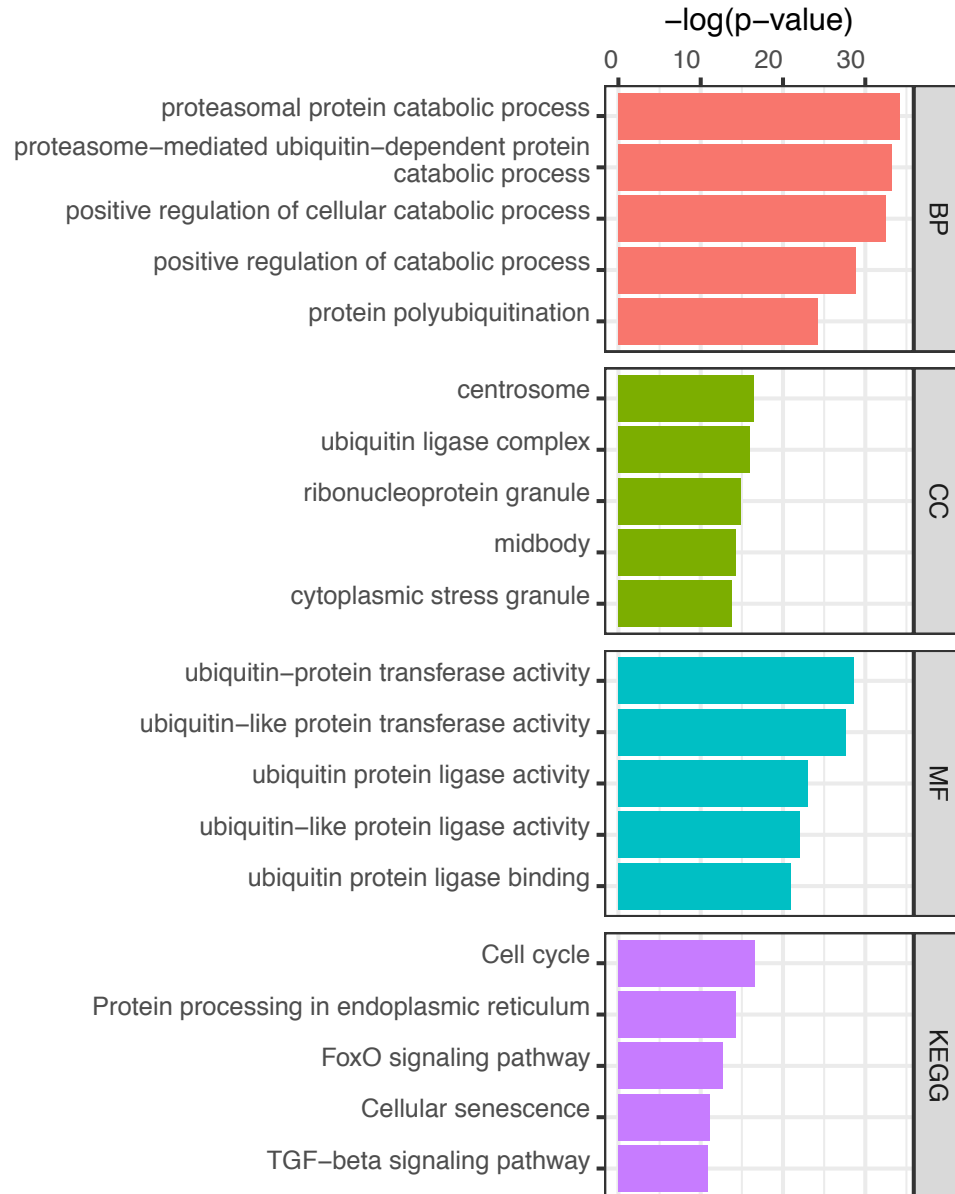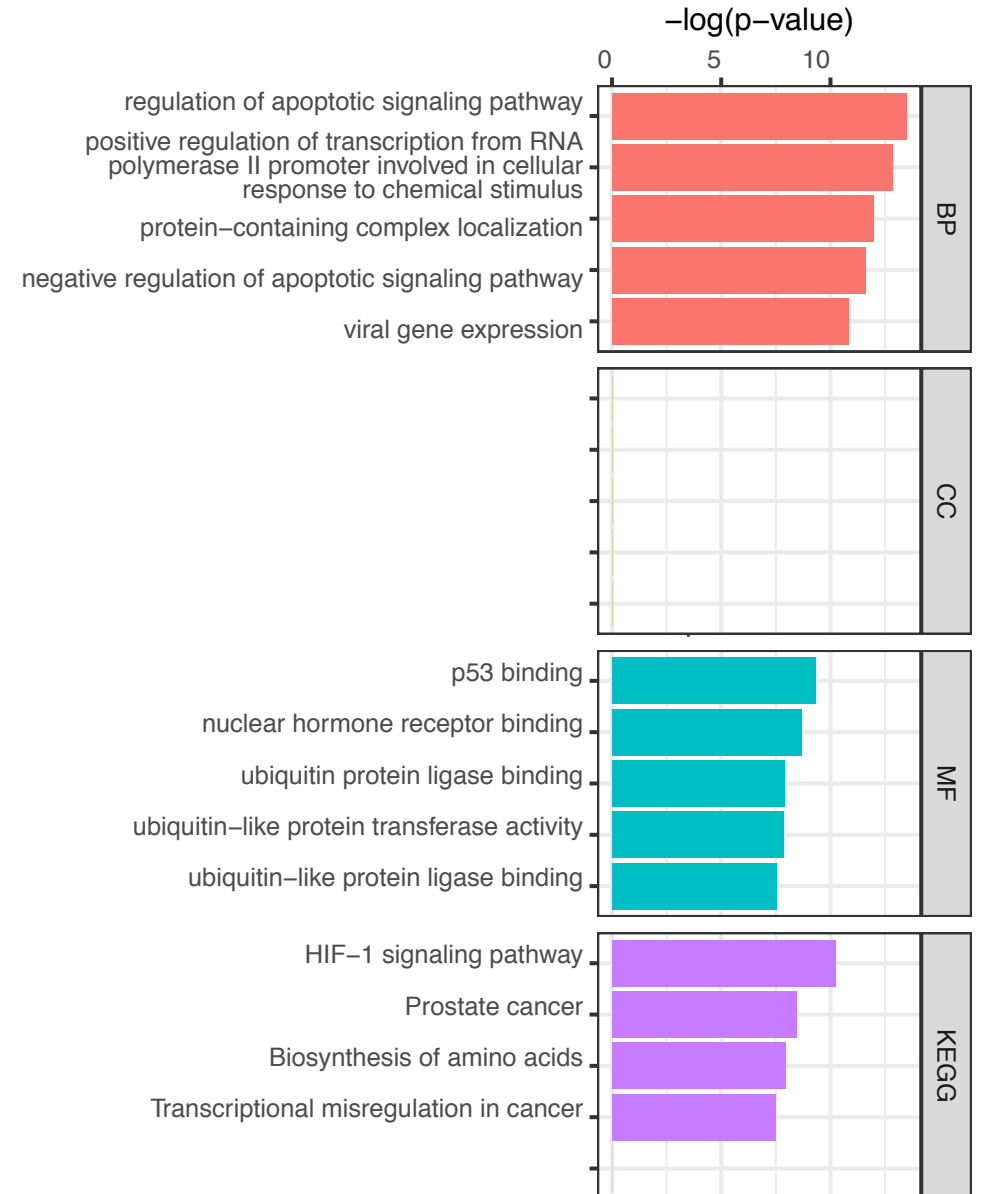

**D****hsa-miR-130b-5p****hsa-miR-130b-3p**

5'

3'

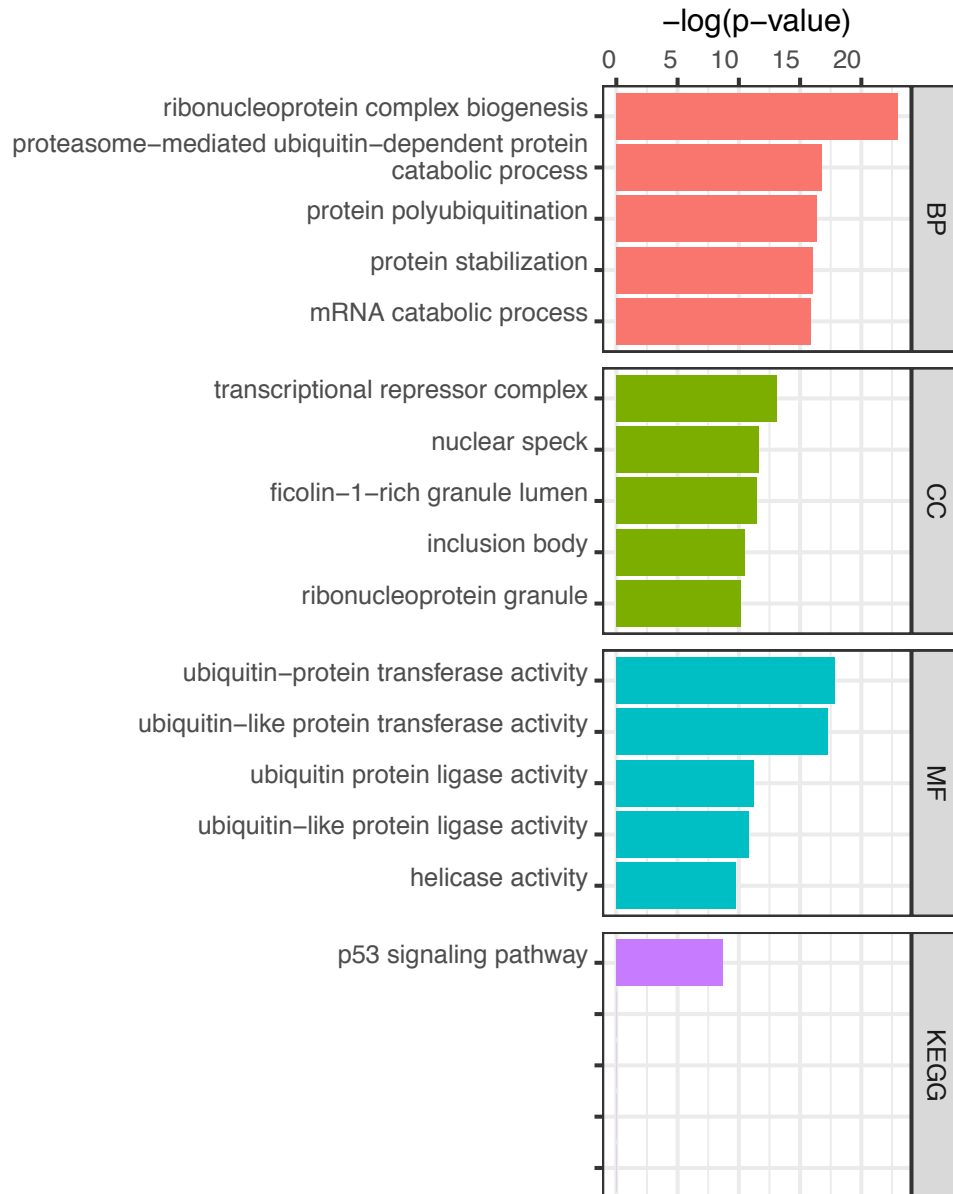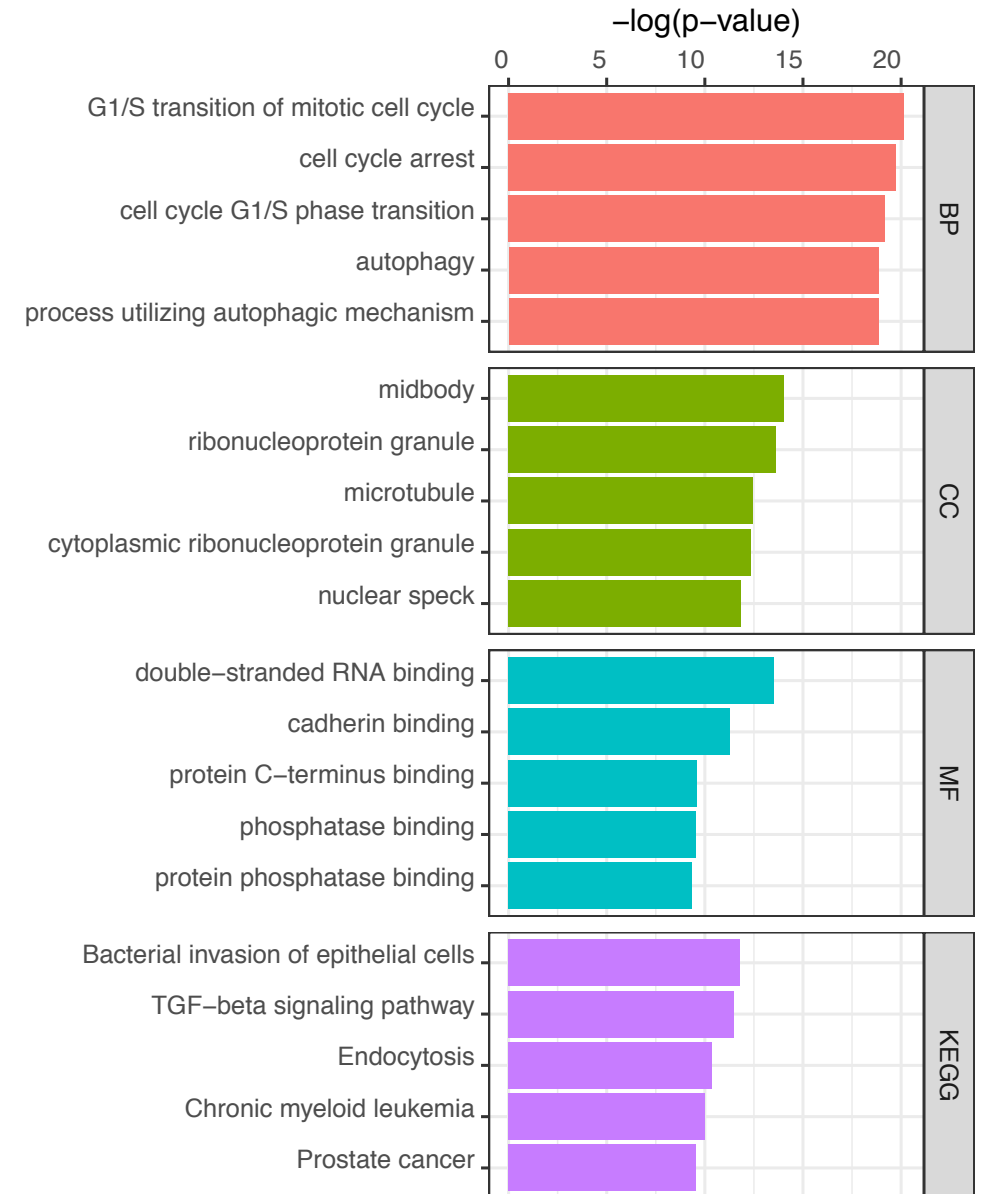

E  
5'

hsa-miR-181a-5p

hsa-miR-181a-2-3p

3'

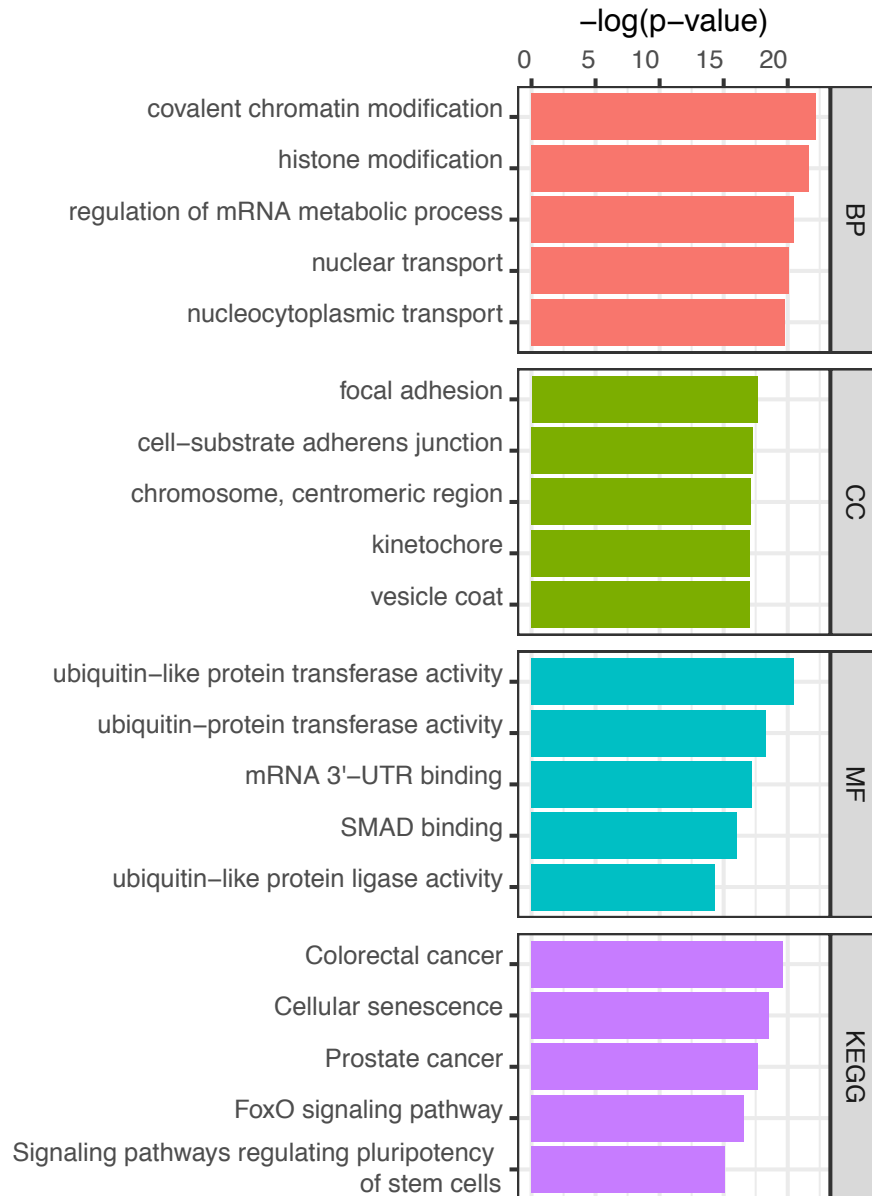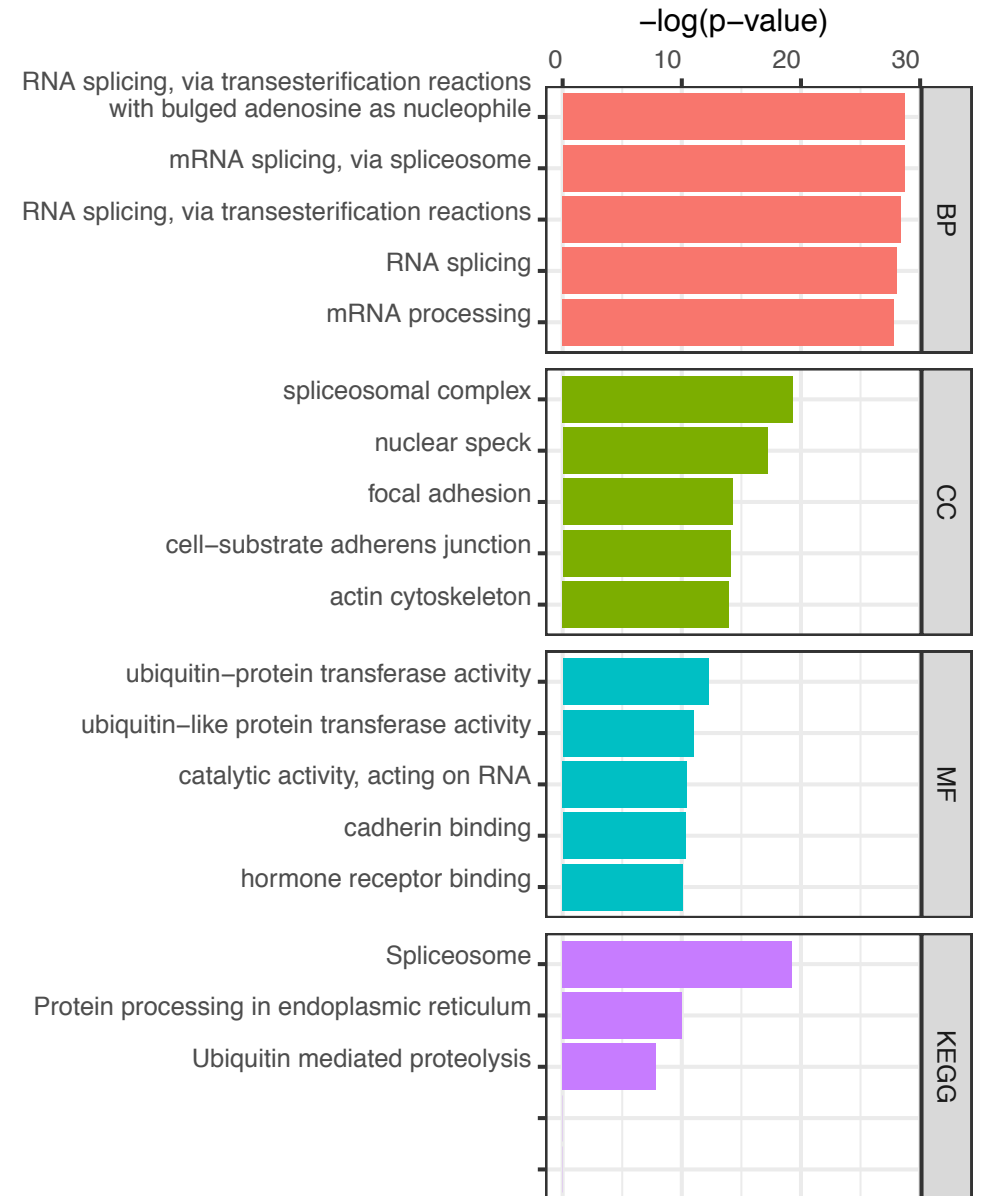

**F**

5'

**hsa-miR-181c-5p****hsa-miR-181c-3p**

3'

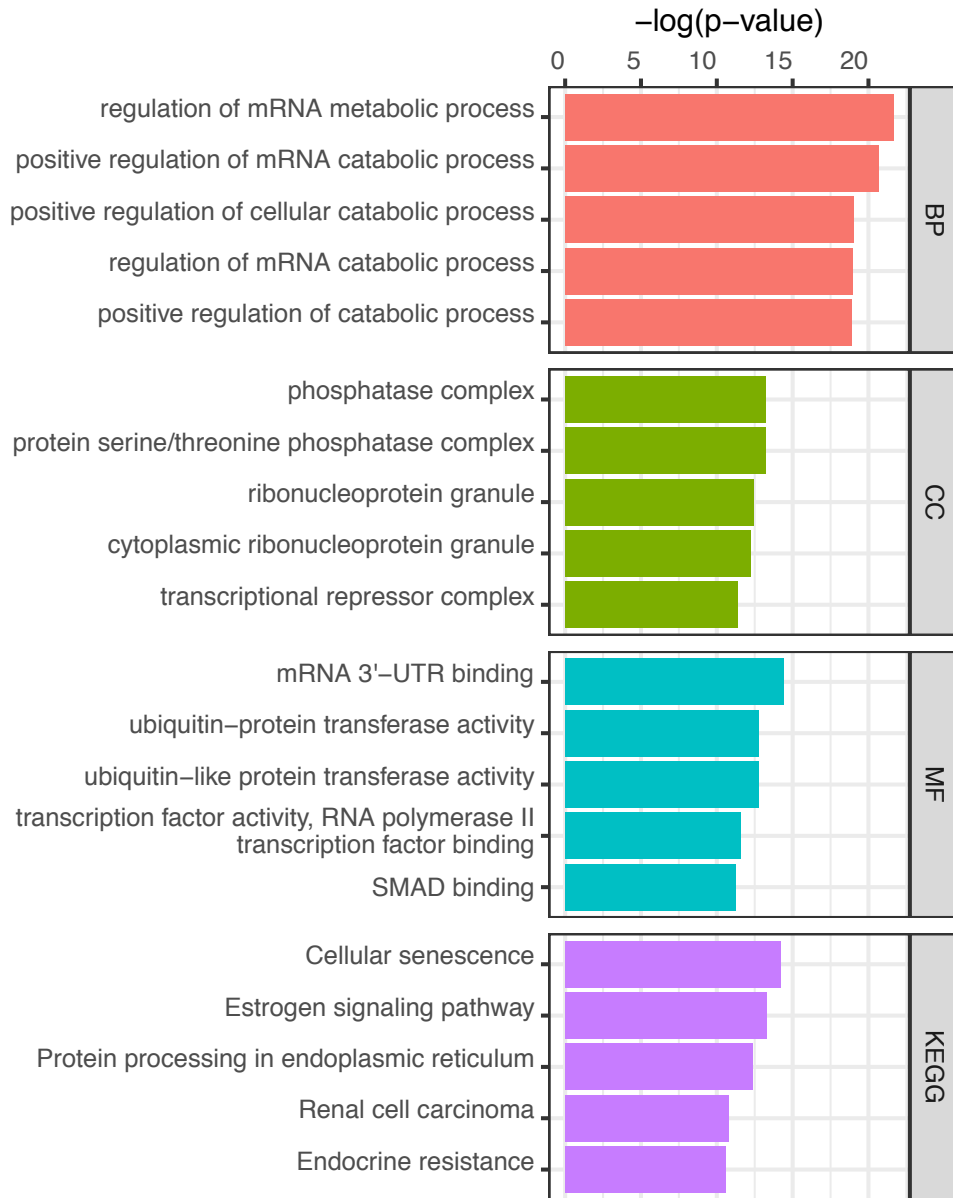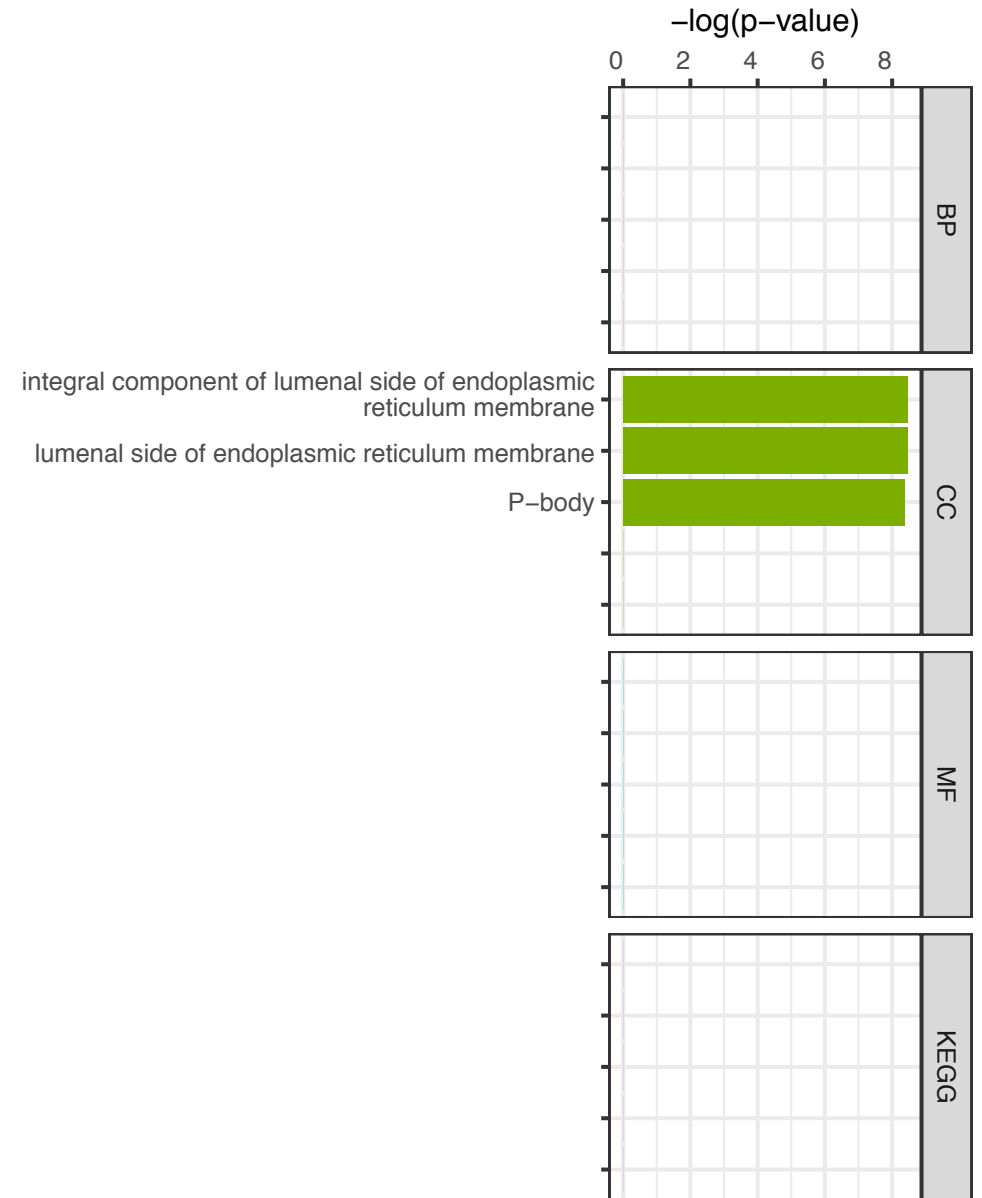

**G****hsa-miR-671-5p****hsa-miR-671-3p**

5'

3'

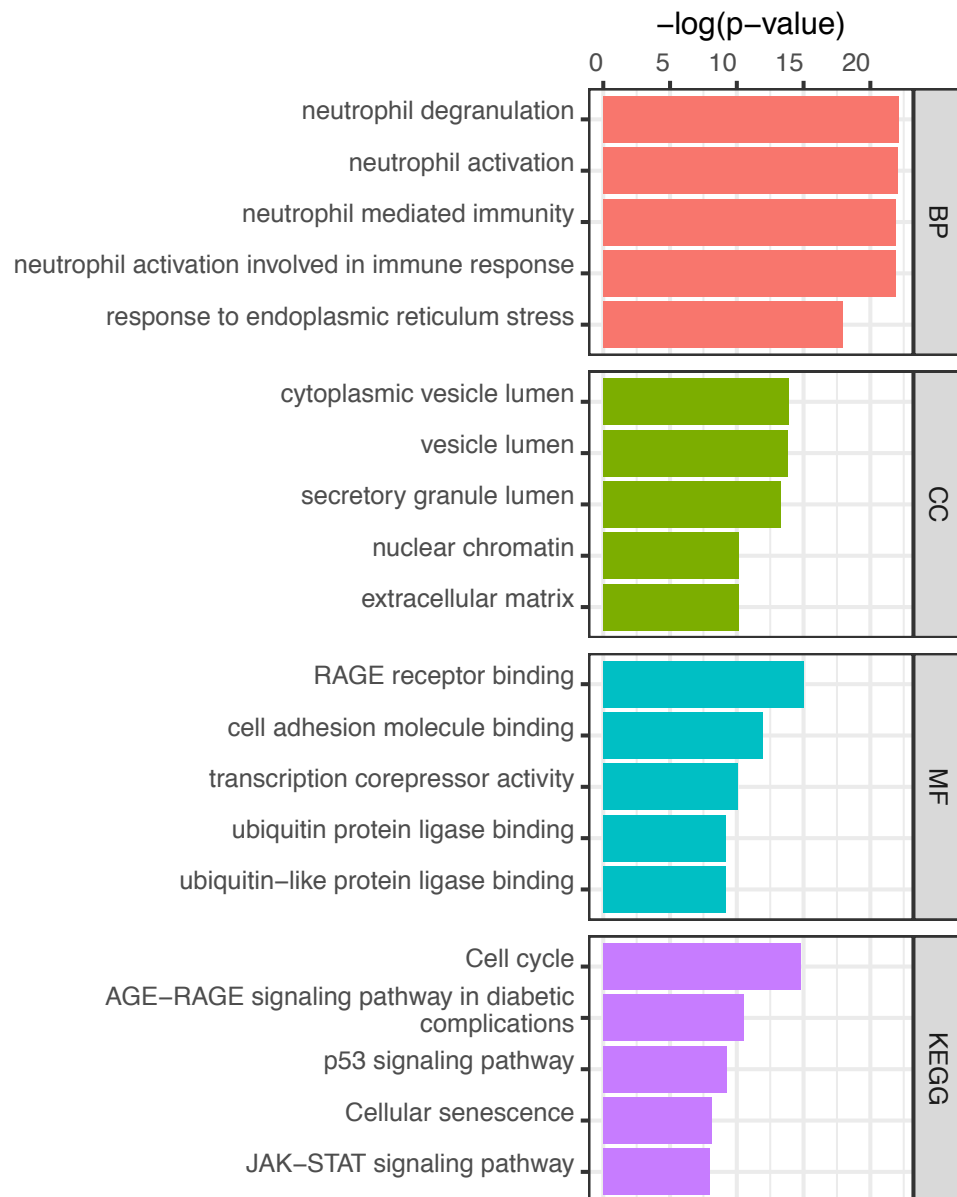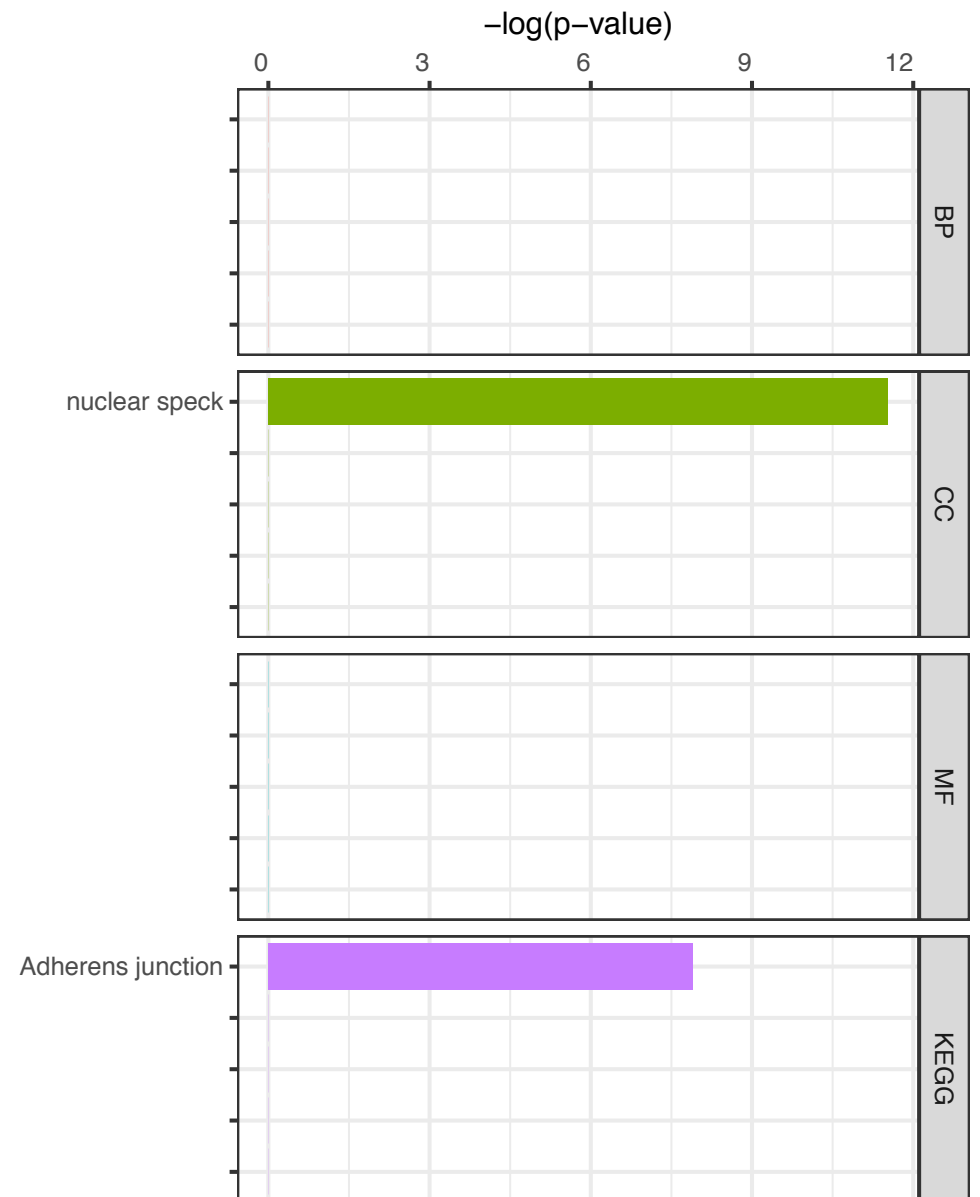

Supplement: mmc1.pdf [file mmc1.pdf]
